# Supplementary material for: Genome-Wide Association Analysis Identifies Variants Associated with Nonalcoholic Fatty Liver Disease That Have Distinct Effects on Metabolic Traits
Source: PLOS journal article supplement (doi:10.1371/journal.pgen.1001324), 2011-03-10
Supplement: S8 (10.1371/journal.pgen.1001324.s008) [file journal.pgen.1001324.s008]

Table S8.

| Nearby Gene | SNP | Impa | Concordancea | Impb | Concordanceb |
| --- | --- | --- | --- | --- | --- |
| *PNPLA3* | rs738409 | 0.9455 | 0.99 | 0.9729 | 0.99 |
| *NCAN* | rs2228603 | 0.7491 | 0.93 | 0.9975 | 0.99 |
| *LYPLAL1* | rs12137855 | 0.9586 | 0.99 | 0.997 | 0.99 |
| *GCKR* | rs780094 | 0.9999 | 0.99 | 0.999 | 0.99 |
| *PPP1R3B* | rs4240624 | 0.9601 | 0.99 | 0.9916 | 0.99 |
