# Supplementary material for: Genome-Wide Association Analysis Identifies Variants Associated with Nonalcoholic Fatty Liver Disease That Have Distinct Effects on Metabolic Traits
Source: PLOS journal article supplement (doi:10.1371/journal.pgen.1001324), 2011-03-10
Supplement: S10 (10.1371/journal.pgen.1001324.s010) [file journal.pgen.1001324.s010]

Table S10.

|  | SNP | EA | tissue | N | Gene | Effecta | P | Padjb | Peak SNPc | Rsqd | P peak | Padje |
| --- | --- | --- | --- | --- | --- | --- | --- | --- | --- | --- | --- | --- |
| *PNPLA3* | rs738409 | G | omental fat | 741 | *SAMM50* | - | 6.86E-07 | 0.001235 | rs6006595 | 0.053228 | 2.54E-16 | 1.30E-12 |
|  |  |  | subcutaneous fat | 608 | *SAMM50* | - | 1.49E-07 | 0.000588 | rs6006595 | 0.058679 | 2.36E-21 | 6.72E-17 |
| *GCKR* | rs780094 | T | liver | 561 | *C2orf16* | + | 6.74E-06 | NA | NA | NA | NA | NA |
|  |  |  | liver | 555 | *IFT172* | + | 1.53E-27 | 0.798425 | rs4665978 | 0.386731 | 1.11E-86 | 1.93E-33 |
|  |  |  | omental fat | 705 | *IFT172* | + | 1.70E-63 | 0.924709 | rs1647276 | 0.449273 | 1.28E-222 | 1.39E-69 |
|  |  |  | subcutaneous fat | 582 | *IFT172* | + | 8.85E-52 | 0.442351 | rs10205219 | 0.415029 | 1.58E-176 | 9.26E-59 |
| *PPP1R3B* | rs4240624 | A | liver | 566 | *AW673036_RC* | + | 4.05E-21 | NA | NA | NA | NA | NA |
|  |  |  | liver | 566 | *PPP1R3B* | + | 1.22E-15 | NA | NA | NA | NA | NA |
|  |  |  | liver | 565 | *AK055863* | - | 2.50E-15 | 0.997045 | rs4841133 | 0.972937 | 2.36E-15 | 0.995253 |
